# Supplementary material for: Temperature-Driven Structural Evolution during Preparation of MCM−41 Mesoporous Silica
Source: MDPI journal article supplement (doi:10.3390/ma17081711), 2024-04-09
Supplement: s1 [file s1]

## Supplementary Materials

# Temperature-Driven Structural Evolution during Preparation of MCM-41 Mesoporous Silica

Tao Xu <sup>1</sup>, Kuixin Cui <sup>1,2</sup> and Shengming Jin <sup>1,2,\*</sup>

<sup>1</sup> School of Minerals Processing and Bioengineering, Central South University, Changsha 410083, China;

xu-tao@mail.csu.edu.cn (T.X.); kuixin.cui@csu.edu.cn (K.C.)

<sup>2</sup> Key Laboratory for Mineral Materials and Application of Hunan Province, Central South University, Changsha 410083, China

\* Correspondence: shmjin@csu.edu.cn

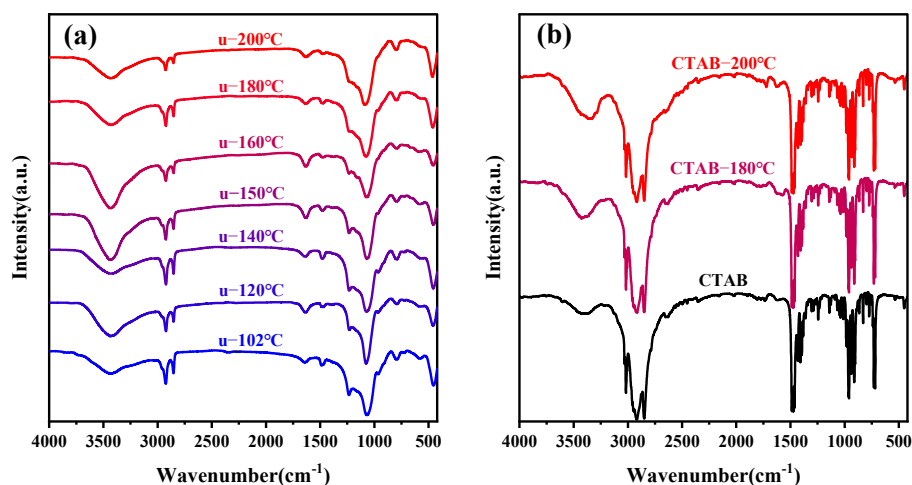

**Figure S1.** FTIR spectra of (a) MCM-41 samples after hydrothermal crystallization at various temperatures; (b) CTAB under different treatment conditions.

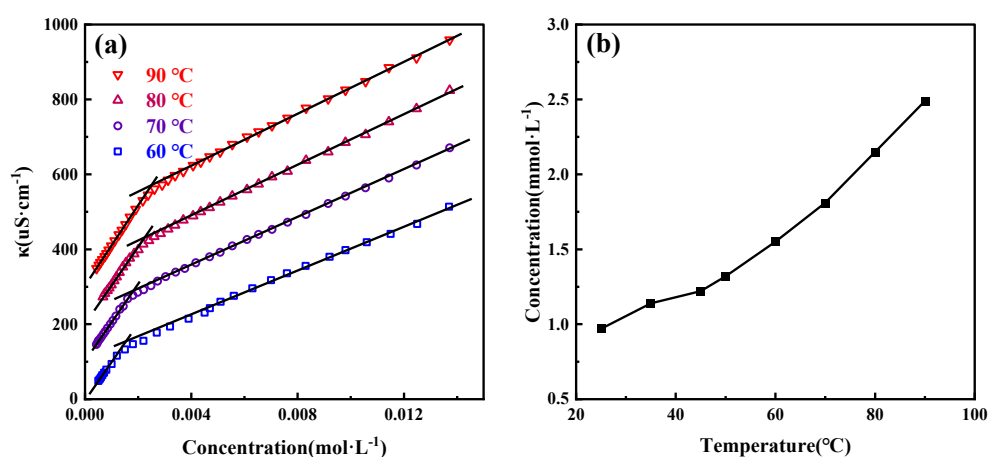

**Figure S2.** (a) Variation of the conductivity of CTAB solutions with concentration at different temperatures; (b) Changes in CMC of CTAB aqueous solutions with temperature.

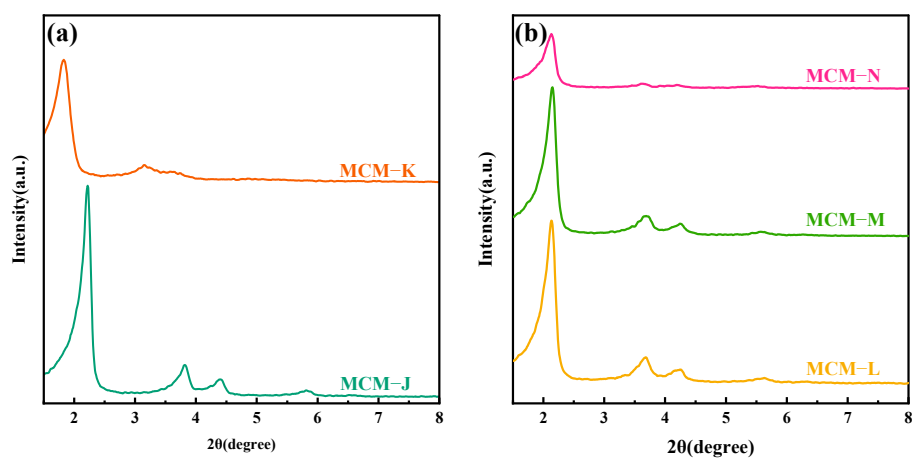

**Figure S3.** SAXD spectra. (a) MCM-J and MCM-K; (b) MCM-L, MCM-M and MCM-N.

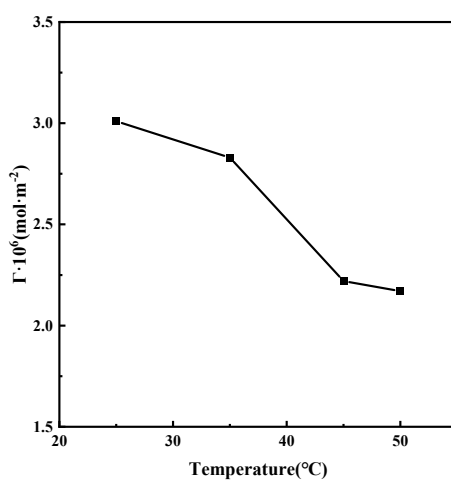

**Figure S4.** The variation of  $\Gamma_{\max}$  with temperature.

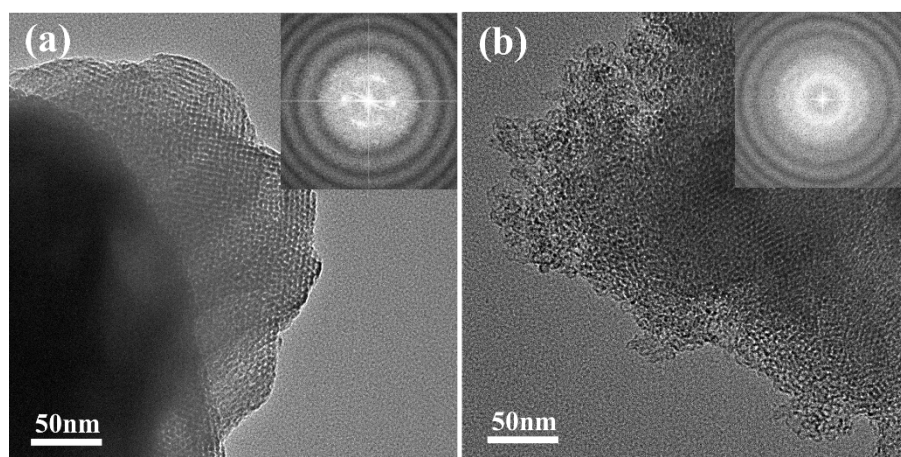

**Figure S5.** TEM image of the sample after different hydrothermal treatment. (a) 180 °C; (b) 200 °C.
